# Supplementary material for: Analysis of Neonatal Neurobehavior and Developmental Outcomes Among Preterm Infants
Source: PubMed Central journal article supplement (PMC9294999; doi:10.1001/jamanetworkopen.2022.22249), 2022-07-18
Supplement: jamanetwopen-e2222249-s001.pdf [file jamanetwopen-e2222249-s001.pdf]

## Supplemental Online Content

McGowan EC, Hofheimer JA, O'Shea TM, et al. Analysis of neonatal neurobehavior and developmental outcomes among preterm infants. *JAMA Netw Open*. 2022;5(7):e2222249. doi:10.1001/jamanetworkopen.2022.22249

**eTable.** Two-Year Neurodevelopmental and Behavioral Outcomes by Medical Risk and Behavior Risk

**eFigure.** NNNS Profiles

This supplemental material has been provided by the authors to give readers additional information about their work.

| <b>eTable. Two-Year Neurodevelopmental and Behavioral Outcomes by Medical Risk* and Behavior Risk**</b> |                                             |                                              |                                              |                                               |
|---------------------------------------------------------------------------------------------------------|---------------------------------------------|----------------------------------------------|----------------------------------------------|-----------------------------------------------|
| <b>Outcome</b>                                                                                          | <b>Low Behavior Risk + Low Medical Risk</b> | <b>Low Behavior Risk + High Medical Risk</b> | <b>High Behavior Risk + Low Medical Risk</b> | <b>High Behavior Risk + High Medical Risk</b> |
| <b>Bayley-III<sup>a</sup></b>                                                                           | <b>n=299</b>                                | <b>n=76</b>                                  | <b>n=106</b>                                 | <b>n=38</b>                                   |
| Cognitive composite < 85                                                                                | 60 (20.1%)                                  | 22 (28.9%)                                   | 24 (22.6%)                                   | 20 (52.6%)                                    |
| Language composite < 85                                                                                 | 101 (33.8%)                                 | 37 (48.7%)                                   | 40 (37.7%)                                   | 21 (55.3%)                                    |
| Motor composite < 85                                                                                    | 31 (10.4%)                                  | 27 (35.5%)                                   | 20 (18.9%)                                   | 20 (52.6%)                                    |
|                                                                                                         |                                             |                                              |                                              |                                               |
| <b>Child Behavior Checklist (CBCL)<sup>a</sup></b>                                                      | <b>n=308</b>                                | <b>n=79</b>                                  | <b>n=113</b>                                 | <b>n=44</b>                                   |
| Internalizing T-Score >63                                                                               | 19 (6.2%)                                   | 5 (6.3%)                                     | 13 (11.5%)                                   | 6 (13.6%)                                     |
| Externalizing T-Score >63                                                                               | 28 (9.1%)                                   | 7 (8.9%)                                     | 14 (12.4%)                                   | 4 (9.1%)                                      |
| Total Problem Score >63                                                                                 | 23 (7.5%)                                   | 8 (10.1%)                                    | 16 (14.2%)                                   | 6 (13.6%)                                     |

\* Medical risks include the following neonatal morbidities: chronic lung disease, brain injury (parenchymal echodensity, periventricular leukomalacia, ventricular dilation), necrotizing enterocolitis/sepsis, severe retinopathy of prematurity. **Low medical risk** defined as  $\leq 1$  morbidity, **high medical risk** defined as  $\geq 2$  morbidities.

\*\* Behavioral risk grouped by NNNS profiles: **low behavioral risk** defined as Profiles 1-4, **high behavioral risk** defined as Profile 5-6

eFigure. NNS Profiles

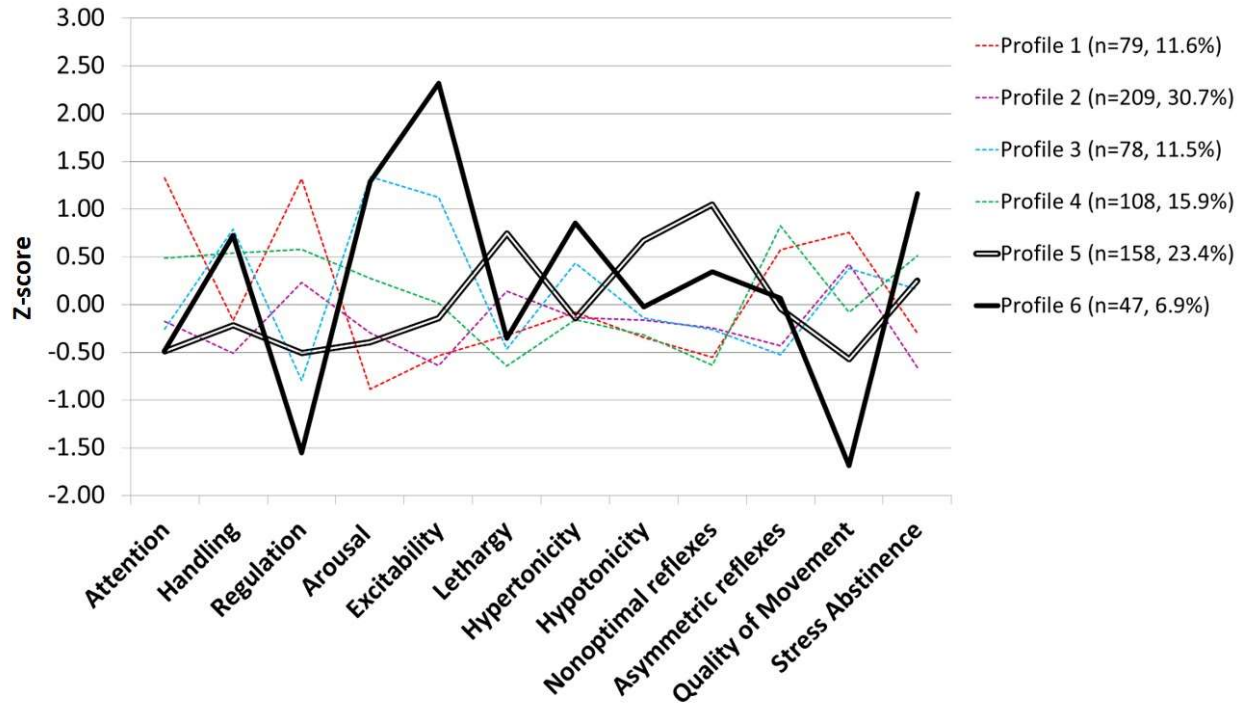

\*Profiles 5 & 6 high risk behavioral profiles
